# Supplementary material for: Classification and Prognostic Characteristics of Hepatocellular Carcinoma Based on Glycolysis Cholesterol Synthesis Axis
Source: Hindawi journal article supplement (doi:10.1155/2022/2014625), 2022-09-30

A

Top10 geneontology\_Biological\_Process

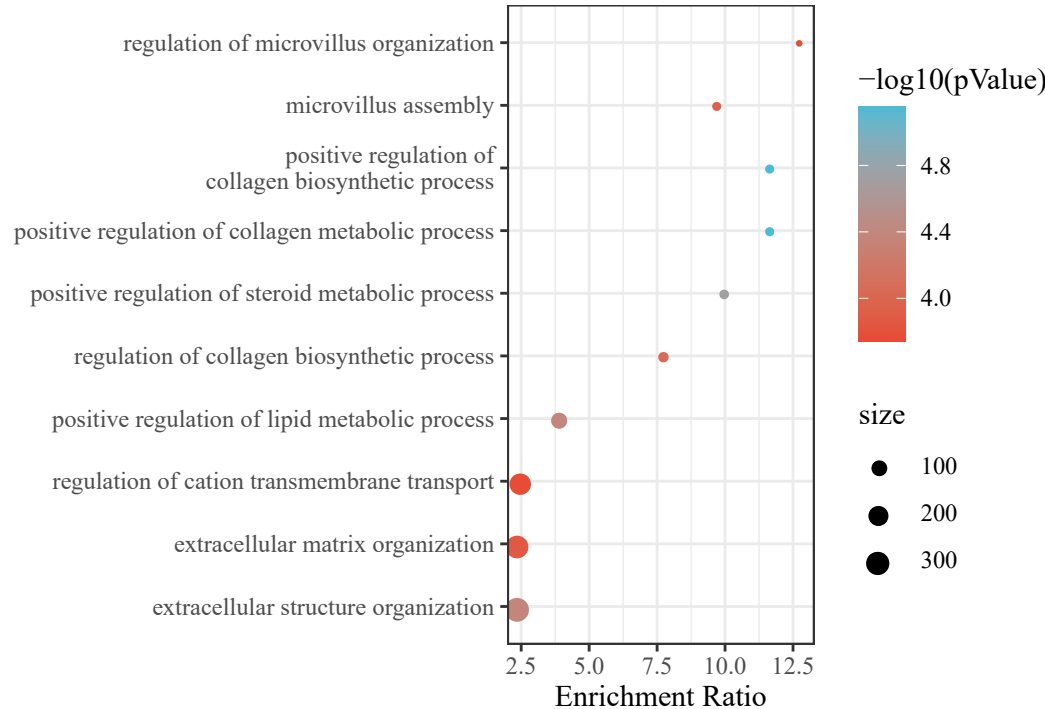

B

Top10 geneontology\_Cellular\_Component

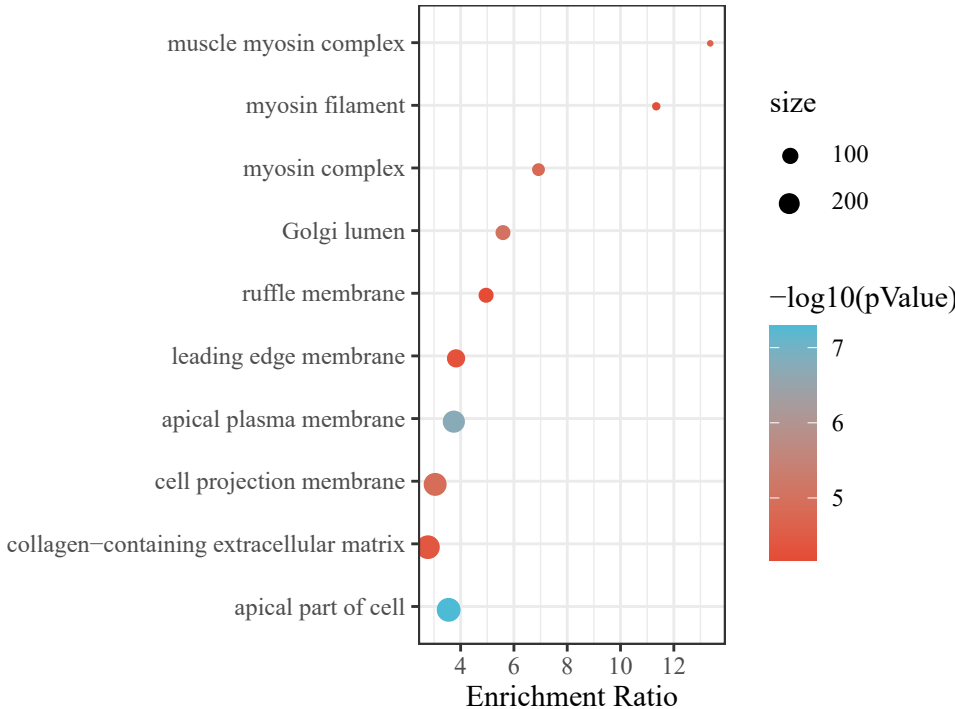

C

Top10 geneontology\_Molecular\_Function

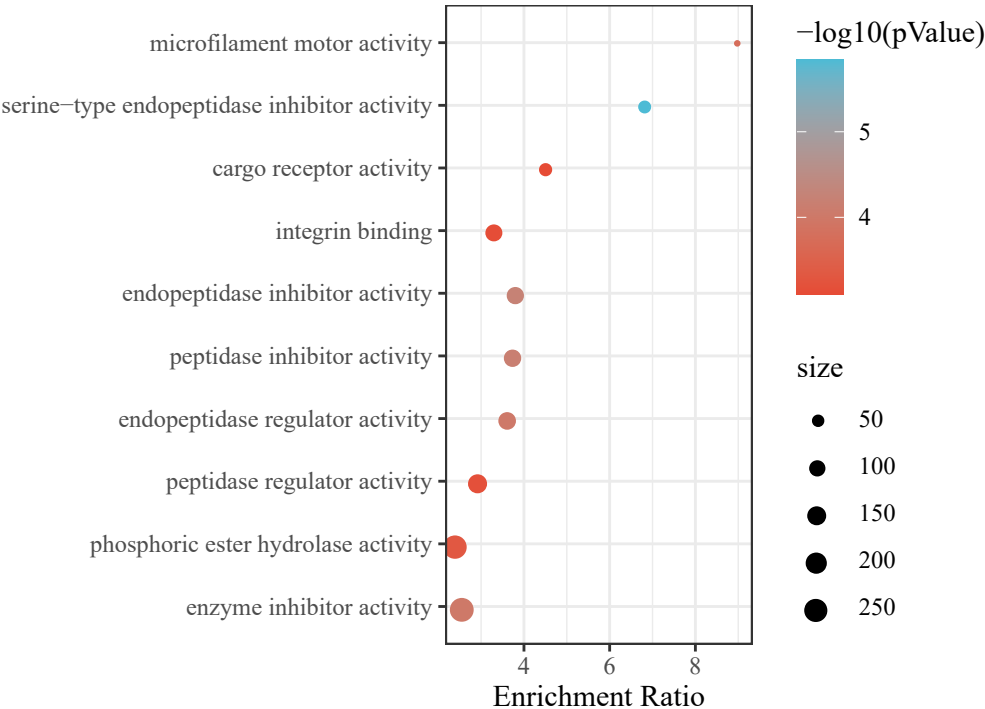

D

Top10 geneontology\_Biological\_Process

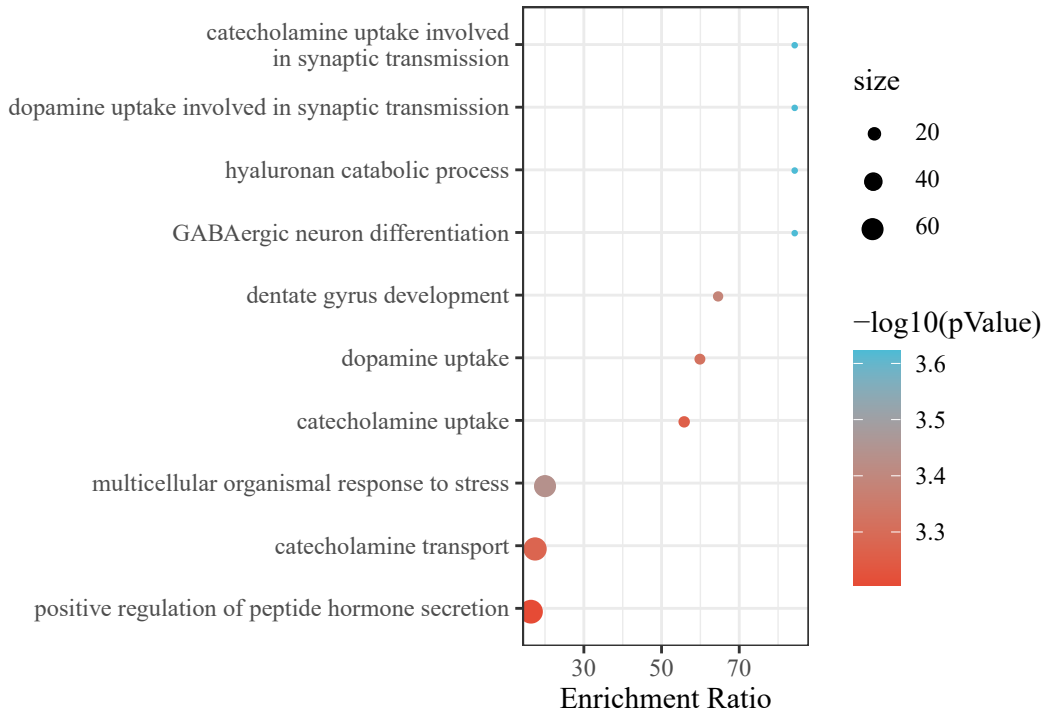

E

All geneontology\_Cellular\_Component

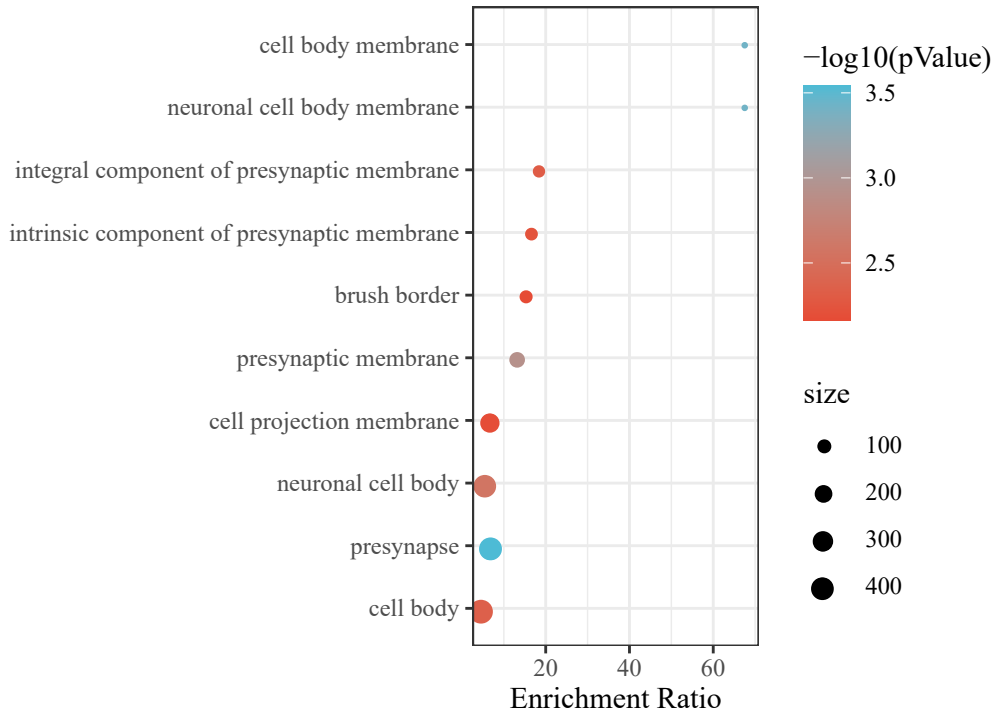

Supplement: f1 [file 2014625.f1.zip]
