# Supplementary material for: Classification and Prognostic Characteristics of Hepatocellular Carcinoma Based on Glycolysis Cholesterol Synthesis Axis
Source: Hindawi journal article supplement (doi:10.1155/2022/2014625), 2022-09-30
Supplement: f1 [file 2014625.f1.zip]

Supplementary Table S1. A list  
of 44 glycolysis/cholesterol-  
related genes.

|         | Genes   | Type        |
|---------|---------|-------------|
| ALDOA   | ALDOA   | GLYCOLYSIS  |
| ENO1    | ENO1    | GLYCOLYSIS  |
| ENO3    | ENO3    | GLYCOLYSIS  |
| DHCR7   | DHCR7   | CHOLESTEROL |
| MVK     | MVK     | CHOLESTEROL |
| CYP51A1 | CYP51A1 | CHOLESTEROL |
| DHCR24  | DHCR24  | CHOLESTEROL |
| PGK1    | PGK1    | GLYCOLYSIS  |
| PFKM    | PFKM    | GLYCOLYSIS  |
| PKLR    | PKLR    | GLYCOLYSIS  |
| PPP2CA  | PPP2CA  | GLYCOLYSIS  |
| ALDOB   | ALDOB   | GLYCOLYSIS  |
| GAPDH   | GAPDH   | GLYCOLYSIS  |
| EBP     | EBP     | CHOLESTEROL |
| TM7SF2  | TM7SF2  | CHOLESTEROL |
| MVD     | MVD     | CHOLESTEROL |
| MSMO1   | MSMO1   | CHOLESTEROL |
| PFKFB2  | PFKFB2  | GLYCOLYSIS  |
| HMGCS1  | HMGCS1  | CHOLESTEROL |
| TPI1    | TPI1    | GLYCOLYSIS  |
| GGPS1   | GGPS1   | CHOLESTEROL |
| SQLE    | SQLE    | CHOLESTEROL |
| ENO2    | ENO2    | GLYCOLYSIS  |
| PFKL    | PFKL    | GLYCOLYSIS  |
| HSD17B7 | HSD17B7 | CHOLESTEROL |
| PPP2R5D | PPP2R5D | GLYCOLYSIS  |
| PFKFB1  | PFKFB1  | GLYCOLYSIS  |
| PFKFB3  | PFKFB3  | GLYCOLYSIS  |
| HMGCR   | HMGCR   | CHOLESTEROL |
| GPI     | GPI     | GLYCOLYSIS  |
| FDFT1   | FDFT1   | CHOLESTEROL |
| PMVK    | PMVK    | CHOLESTEROL |
| PPP2R1B | PPP2R1B | GLYCOLYSIS  |
| PPP2R1A | PPP2R1A | GLYCOLYSIS  |
| IDI1    | IDI1    | CHOLESTEROL |
| LBR     | LBR     | CHOLESTEROL |
| ALDOC   | ALDOC   | GLYCOLYSIS  |
| LSS     | LSS     | CHOLESTEROL |
| PGAM1   | PGAM1   | GLYCOLYSIS  |
| PFKP    | PFKP    | GLYCOLYSIS  |
| NSDHL   | NSDHL   | CHOLESTEROL |
| PPP2CB  | PPP2CB  | GLYCOLYSIS  |
| FDPS    | FDPS    | CHOLESTEROL |
| TPI1P1  | TPI1P1  | GLYCOLYSIS  |
