# Supplementary figures and images for: Classification and Prognostic Characteristics of Hepatocellular Carcinoma Based on Glycolysis Cholesterol Synthesis Axis
Source: Hindawi journal article supplement (doi:10.1155/2022/2014625), 2022-09-30

A

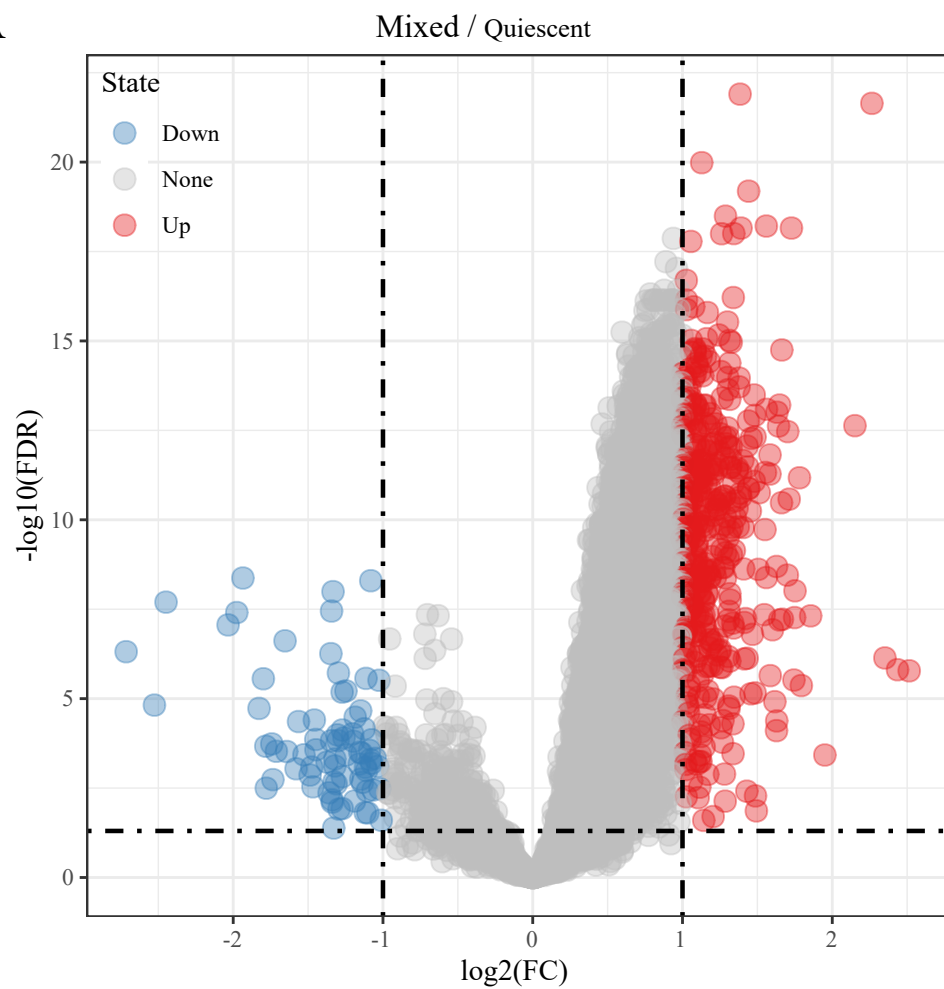

B

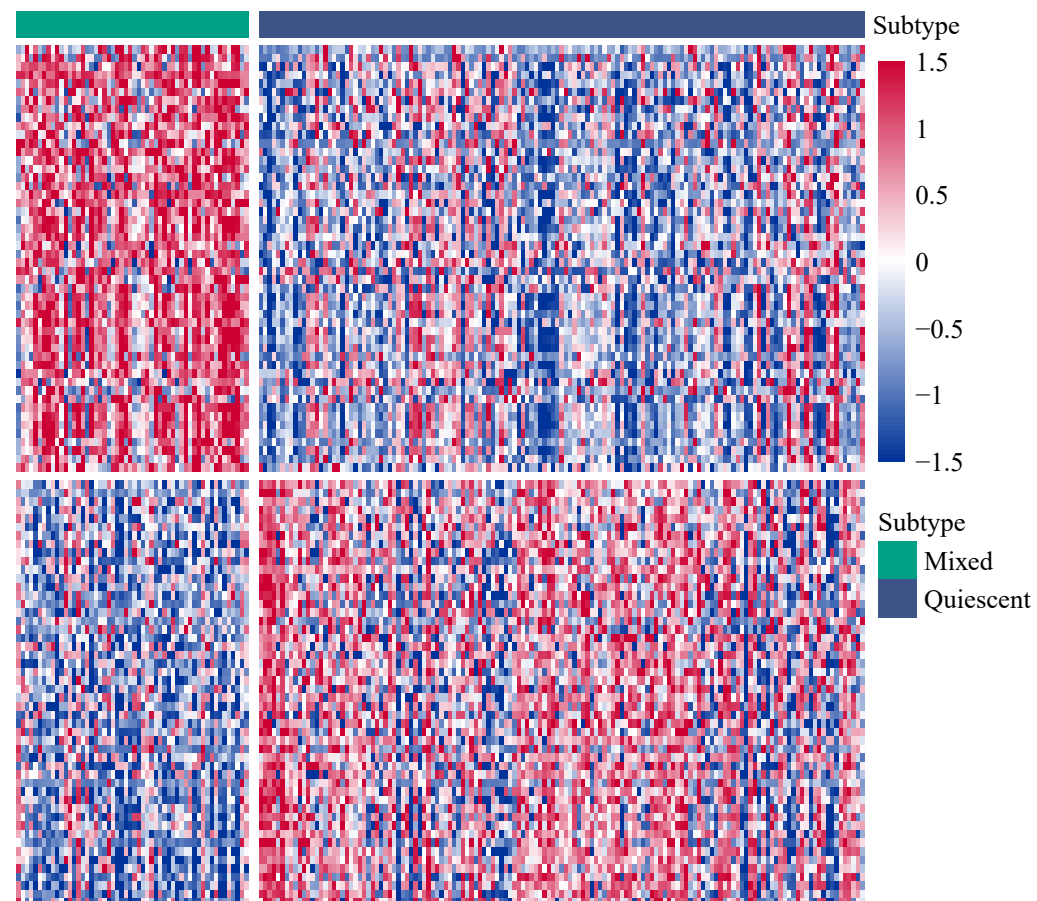

C

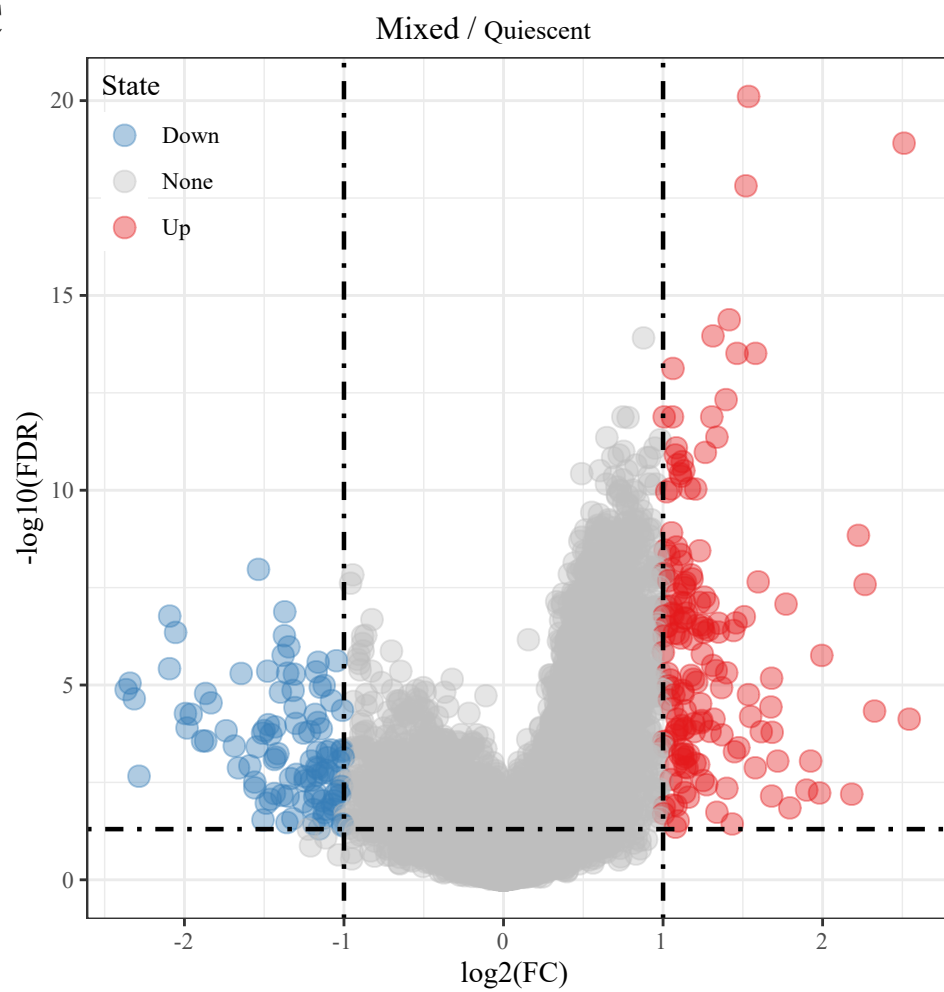

D

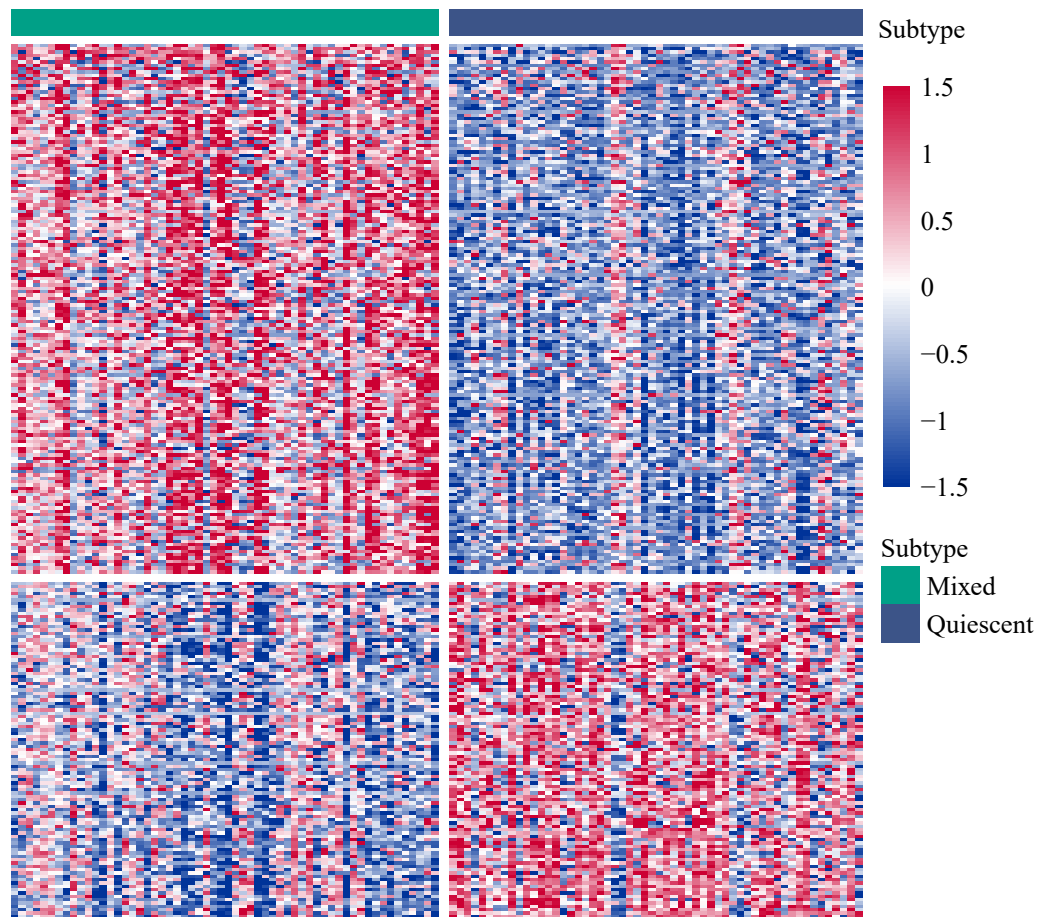

Supplement: f1 [file 2014625.f1.zip]

A

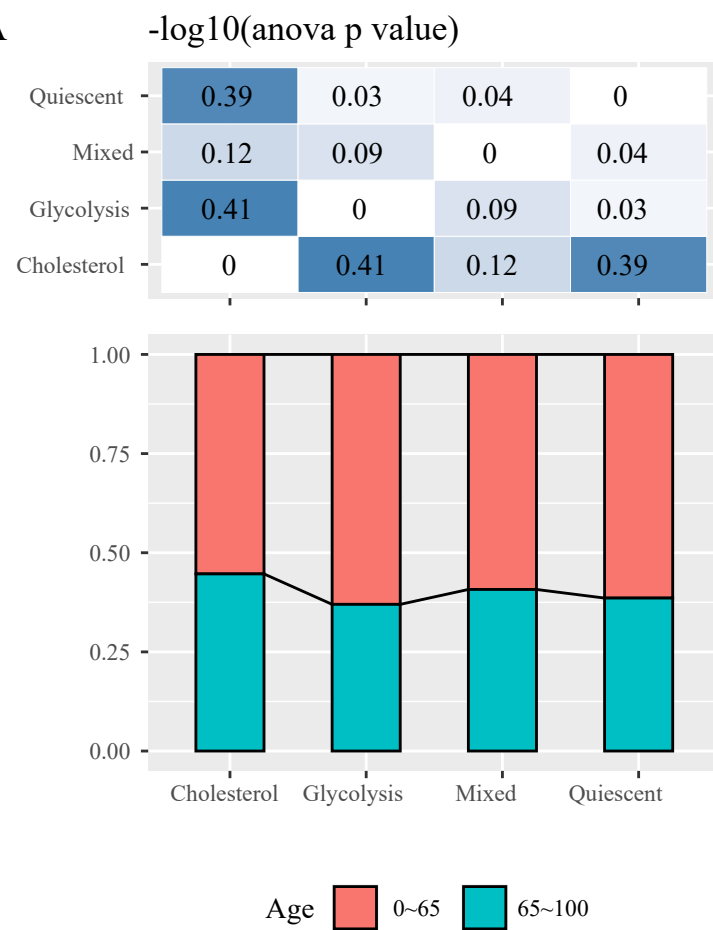

B

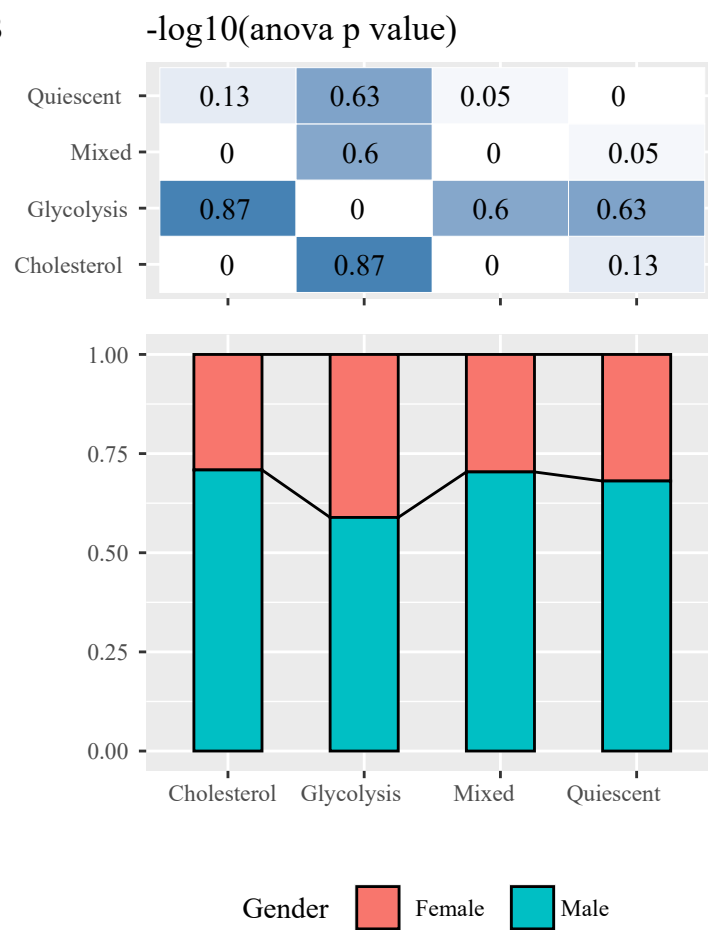

C

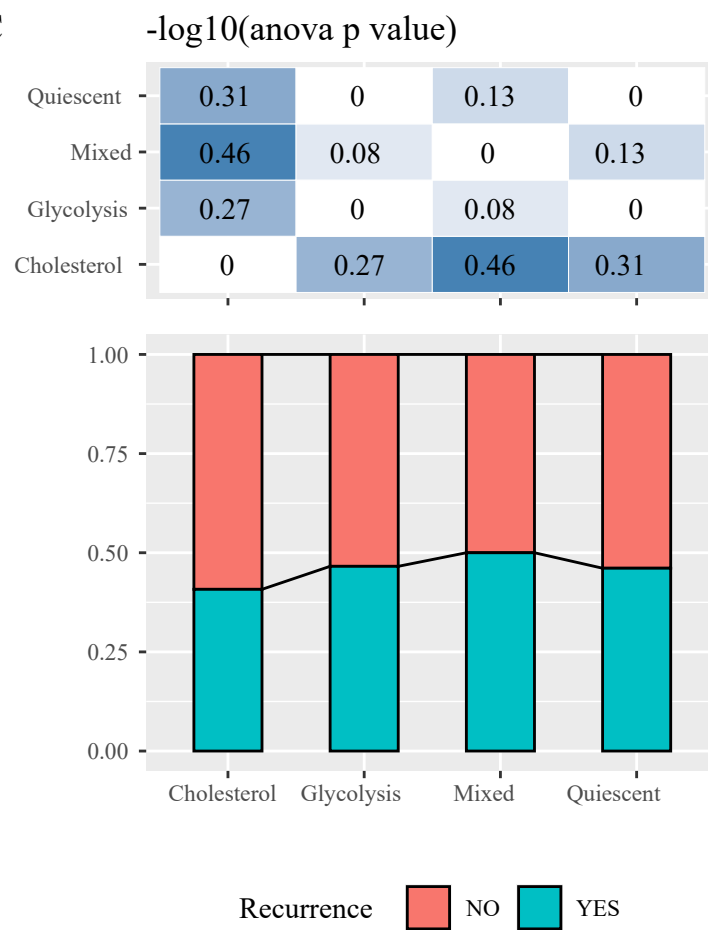

D

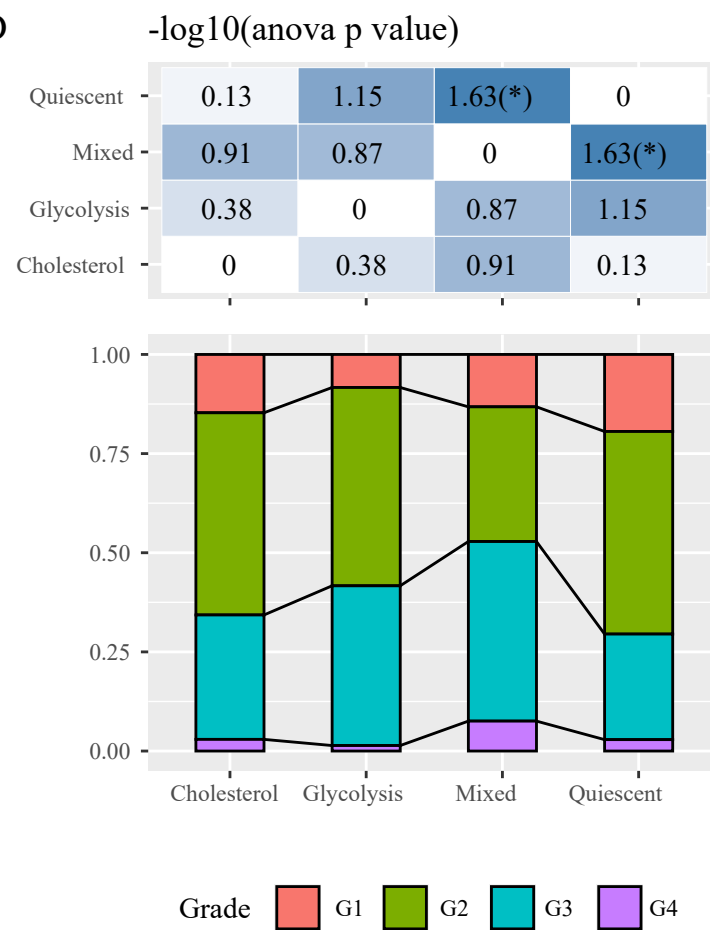

E

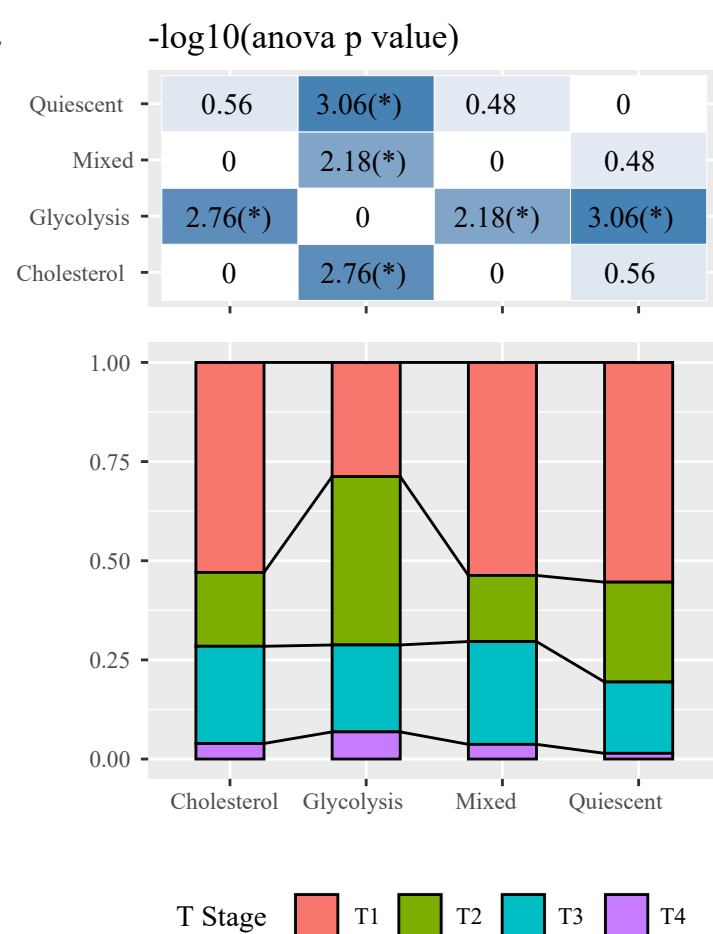

F

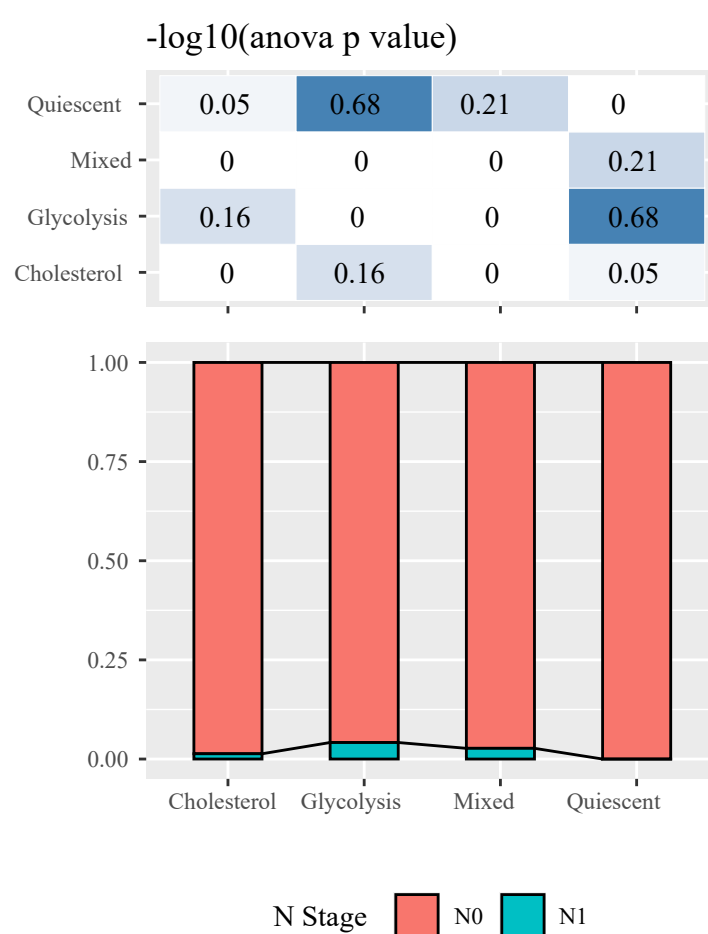

G

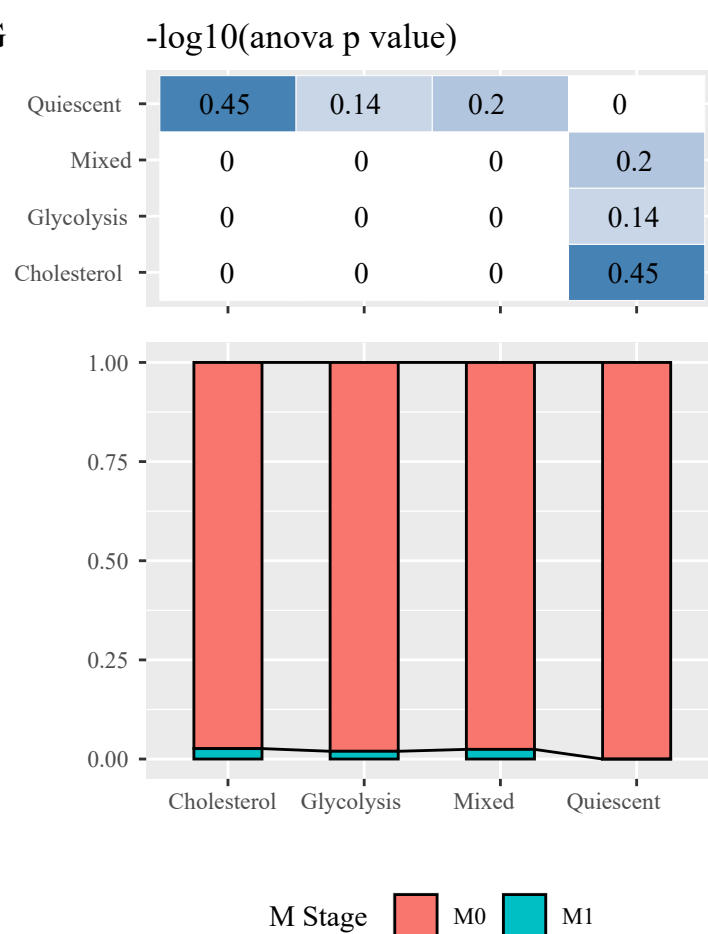

H

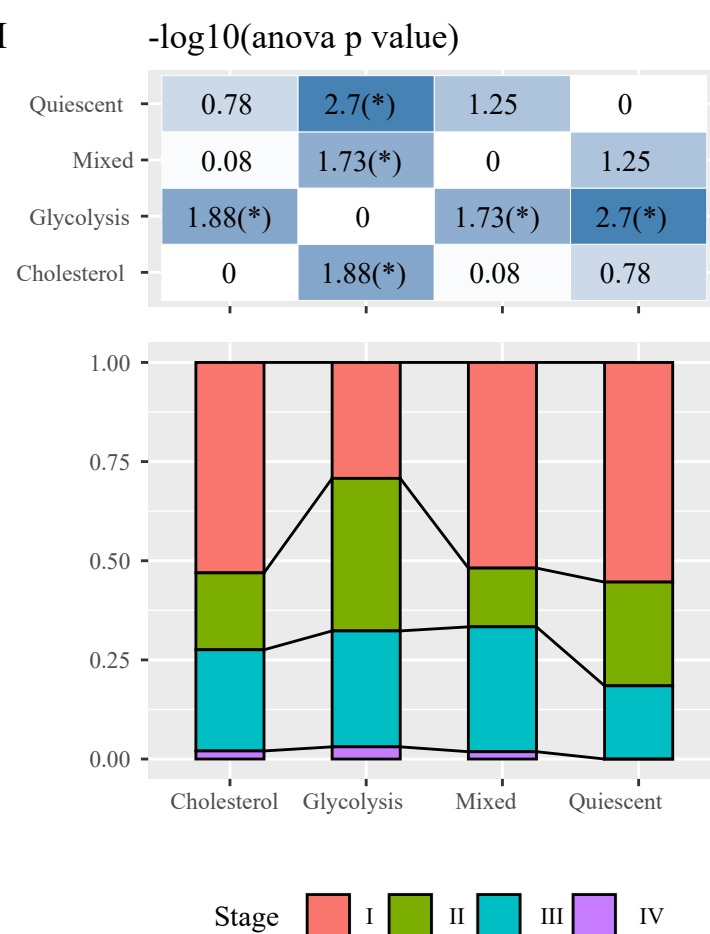

I

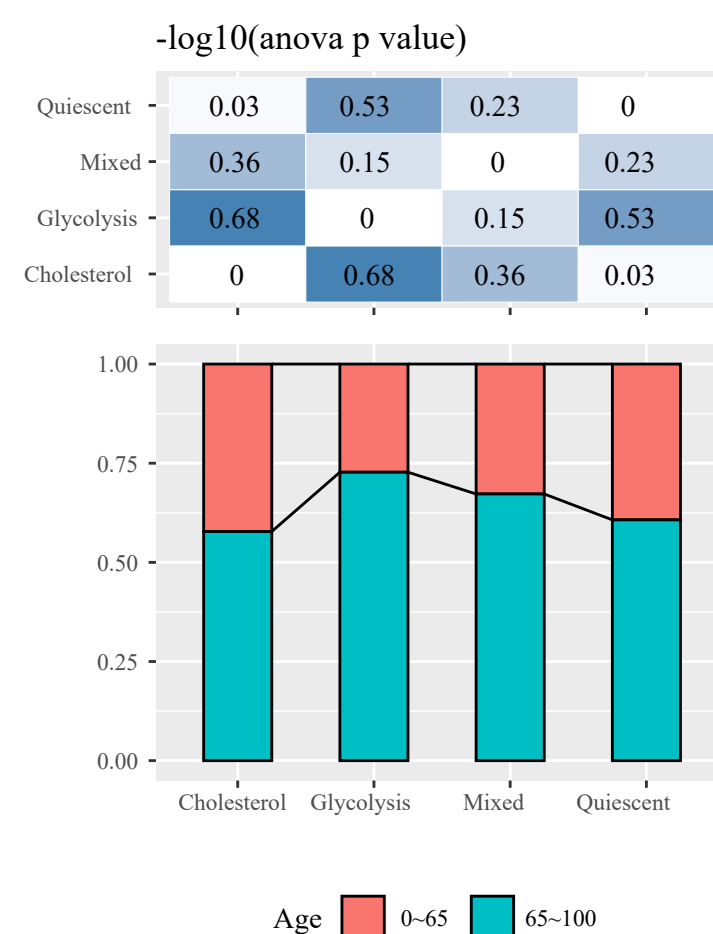

J

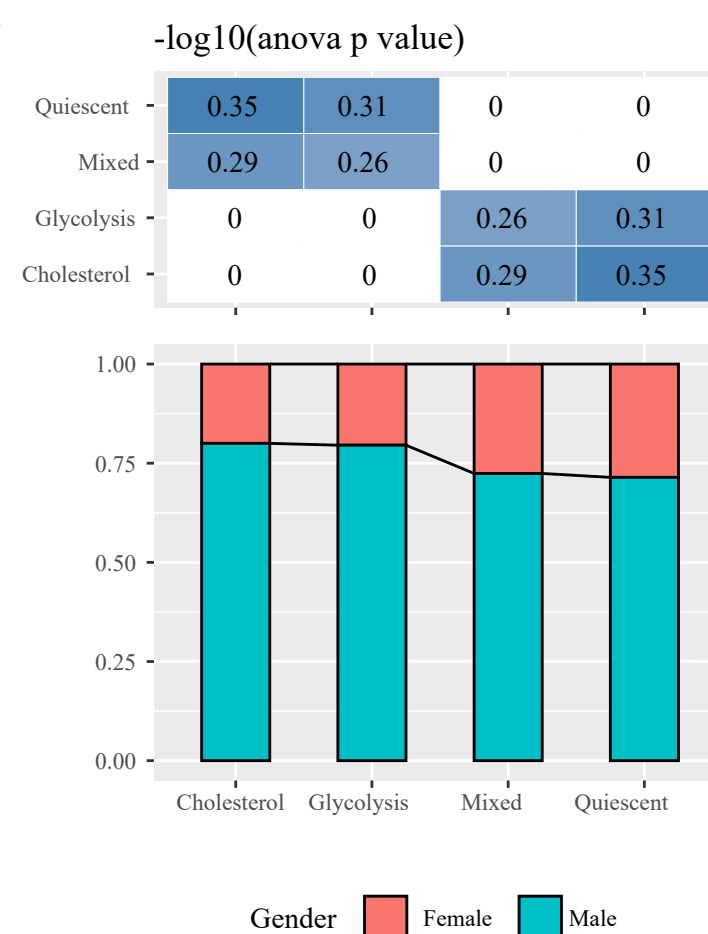

K

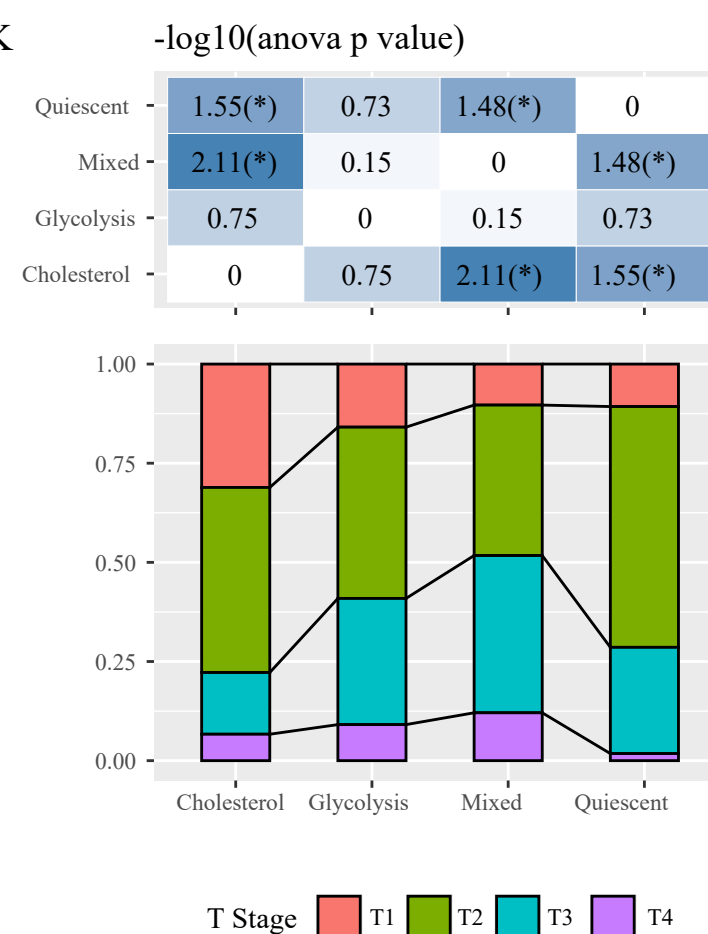

Supplement: f1 [file 2014625.f1.zip]

A

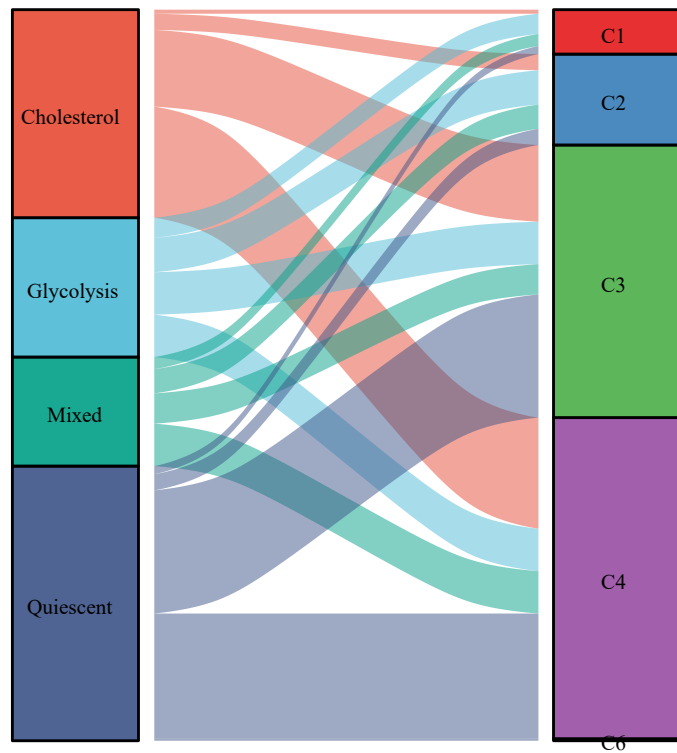

B

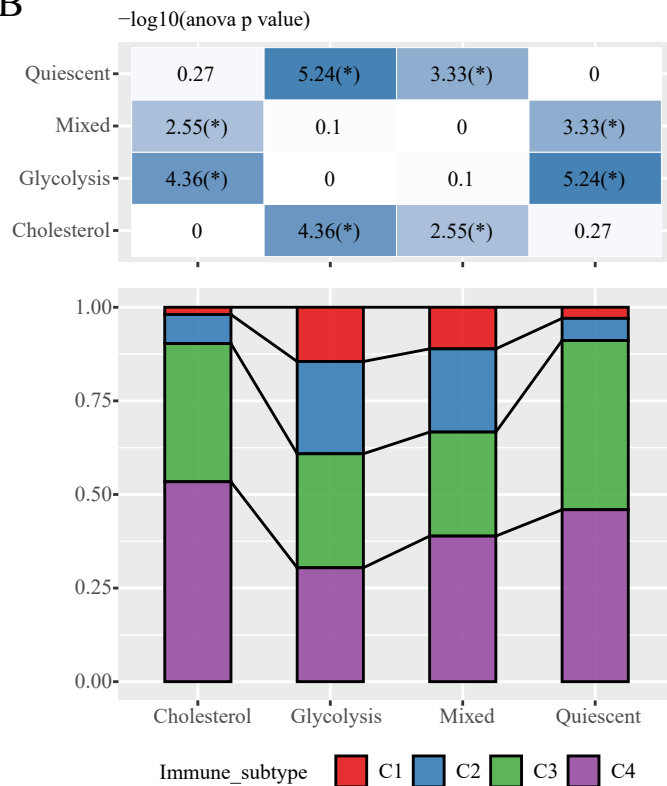

Supplement: f1 [file 2014625.f1.zip]

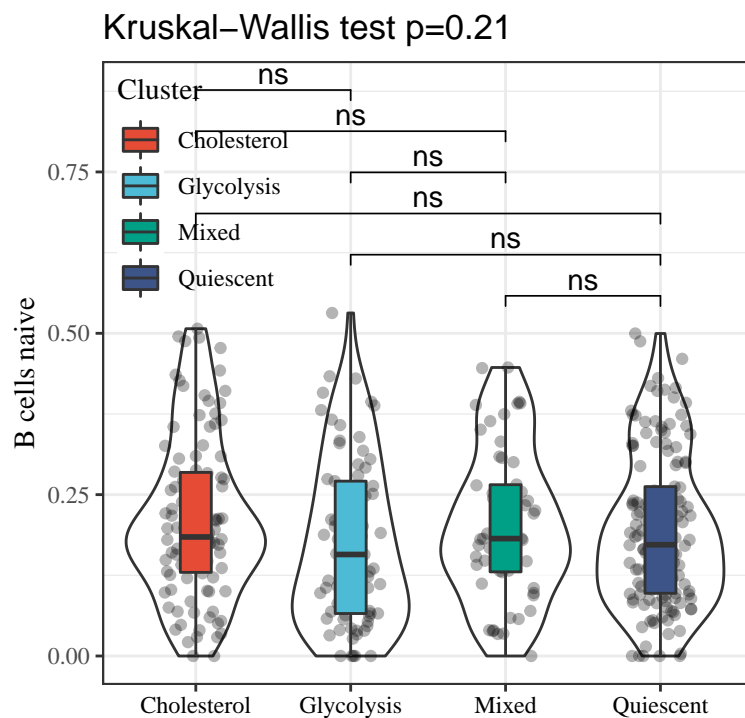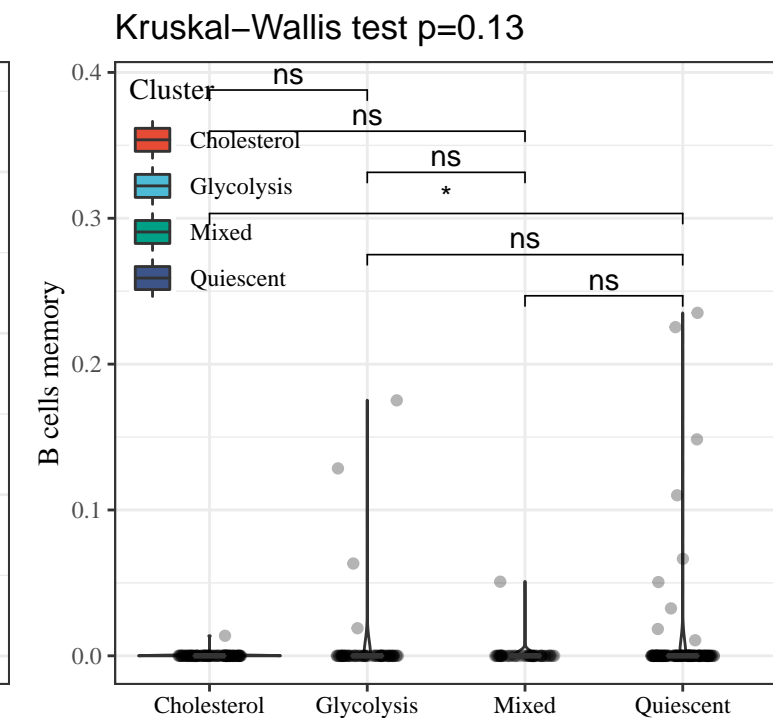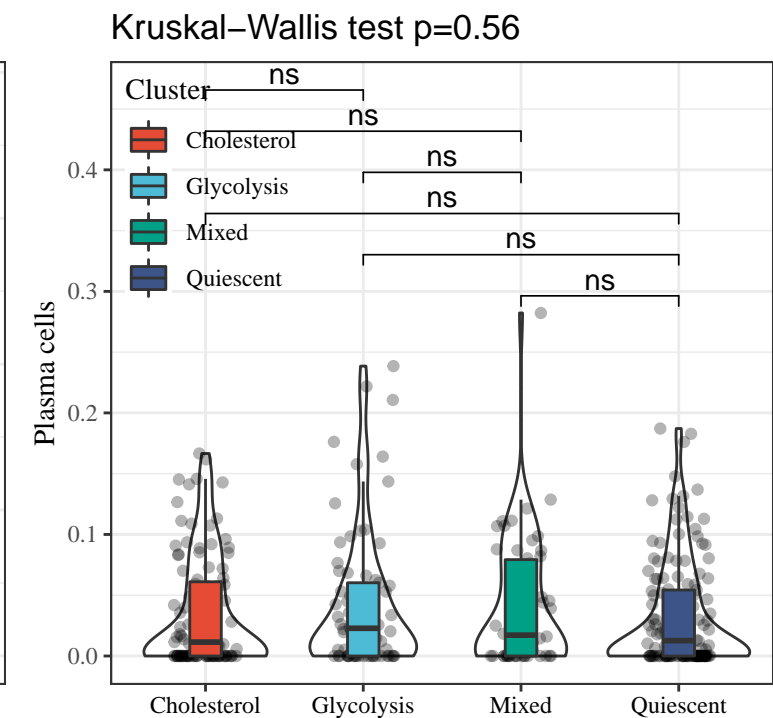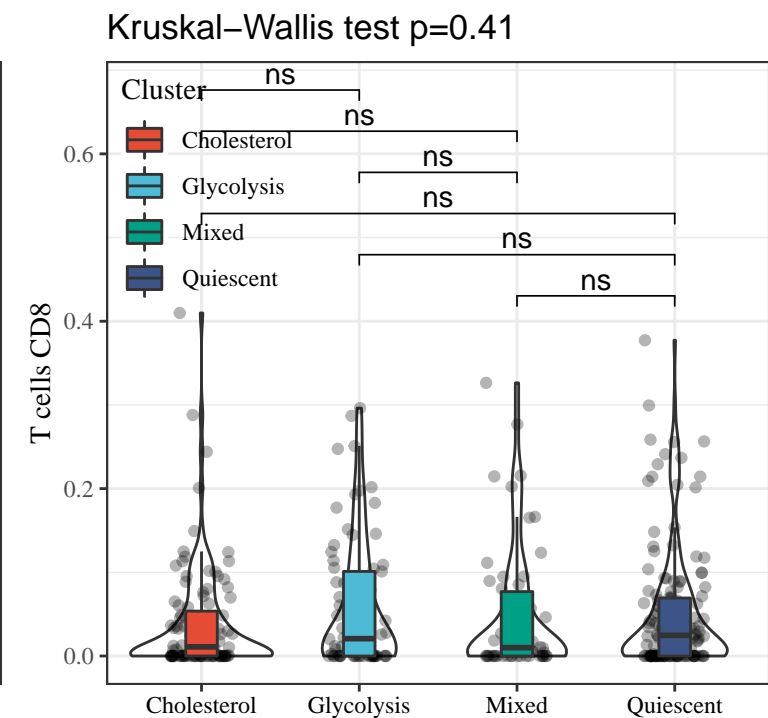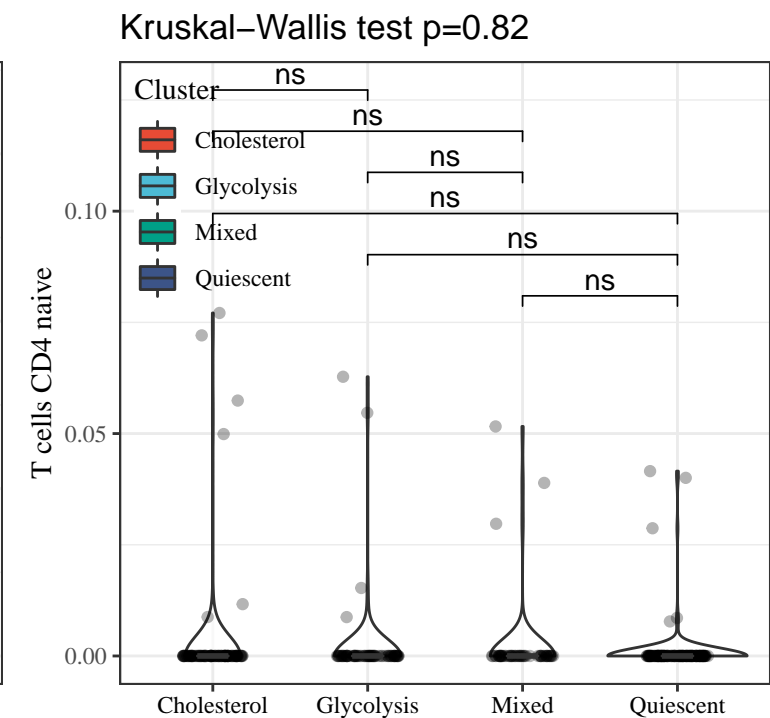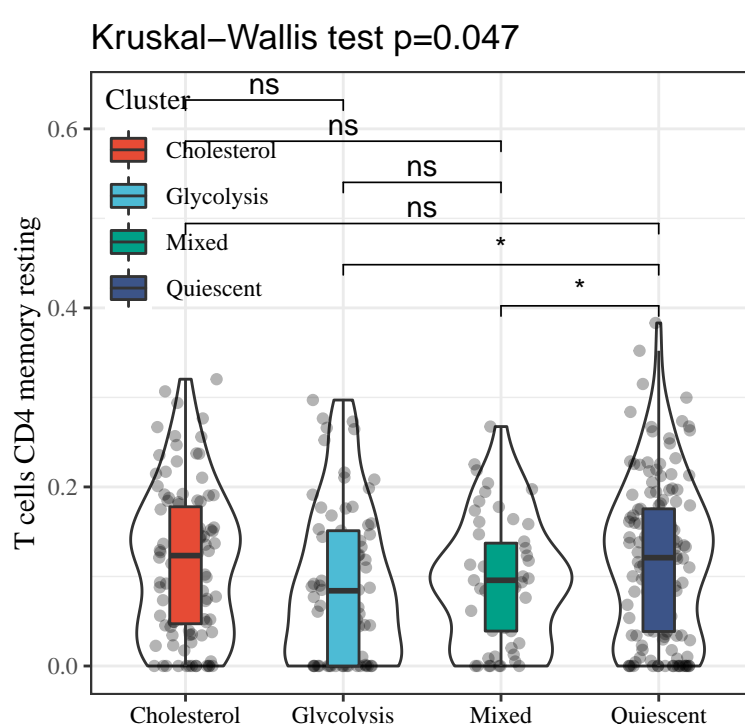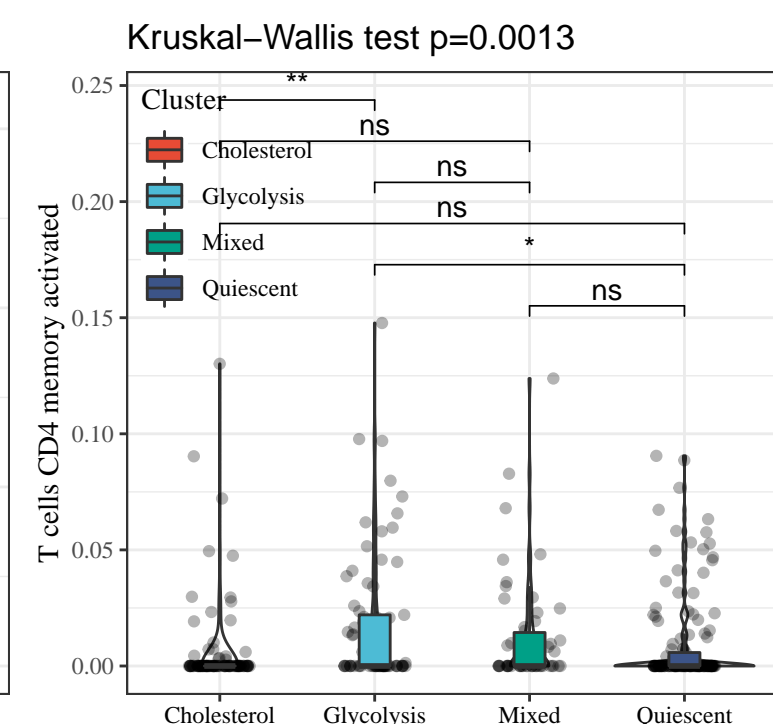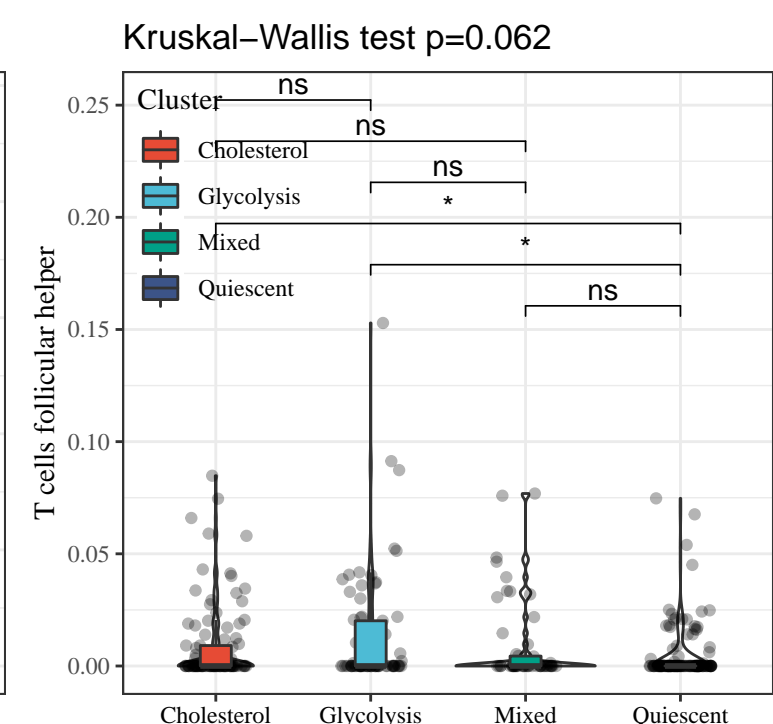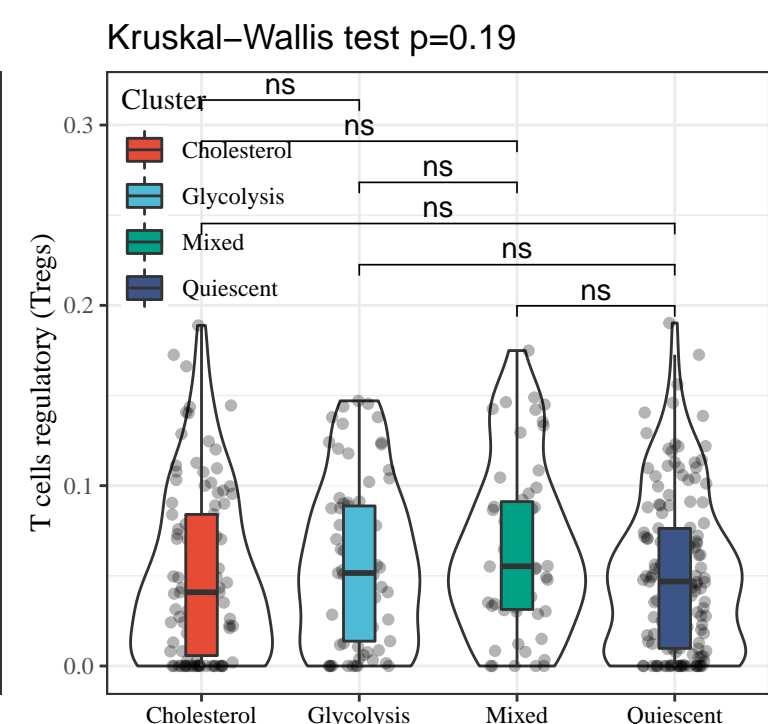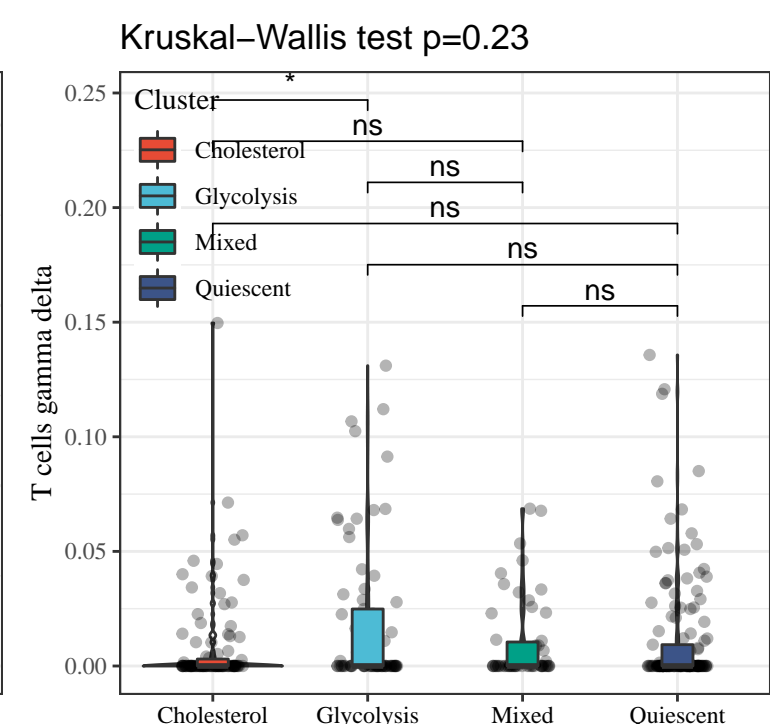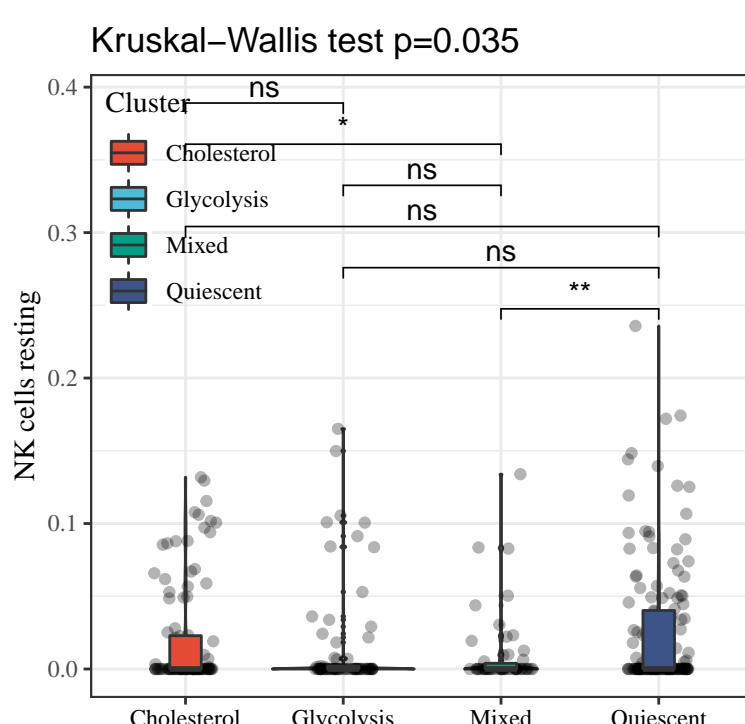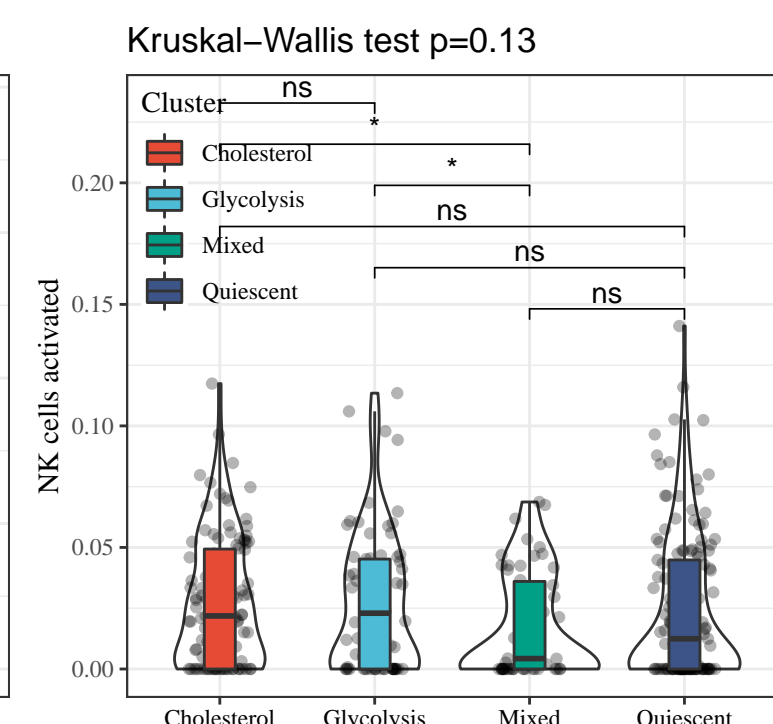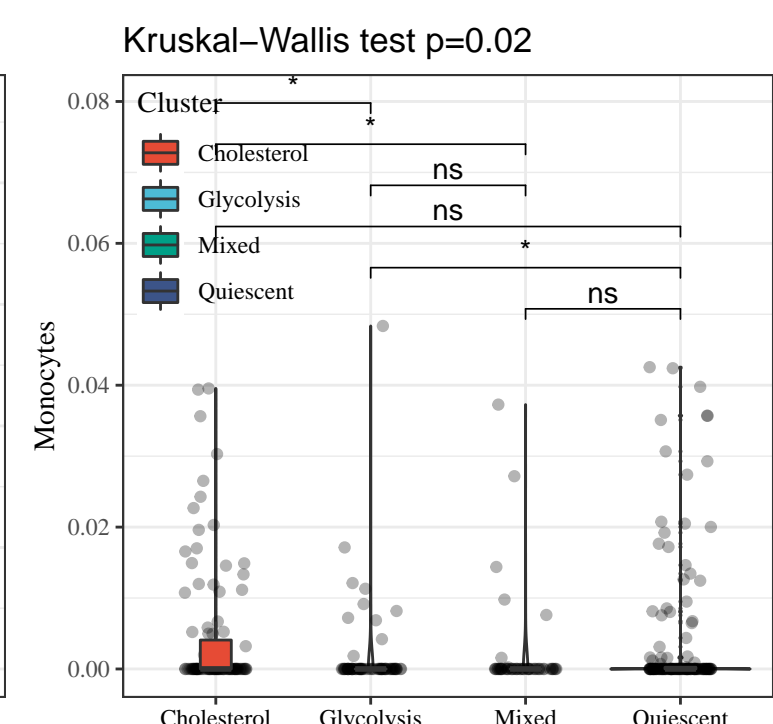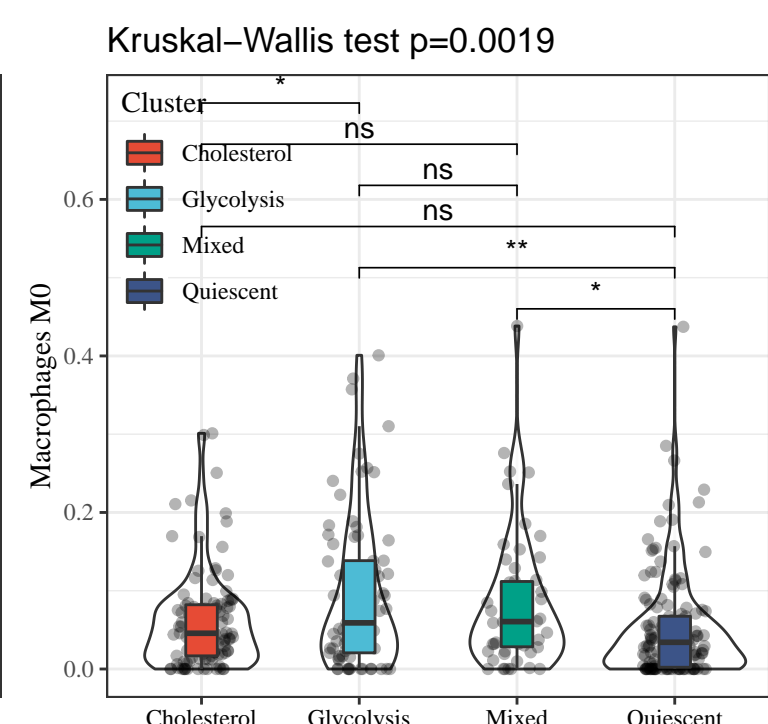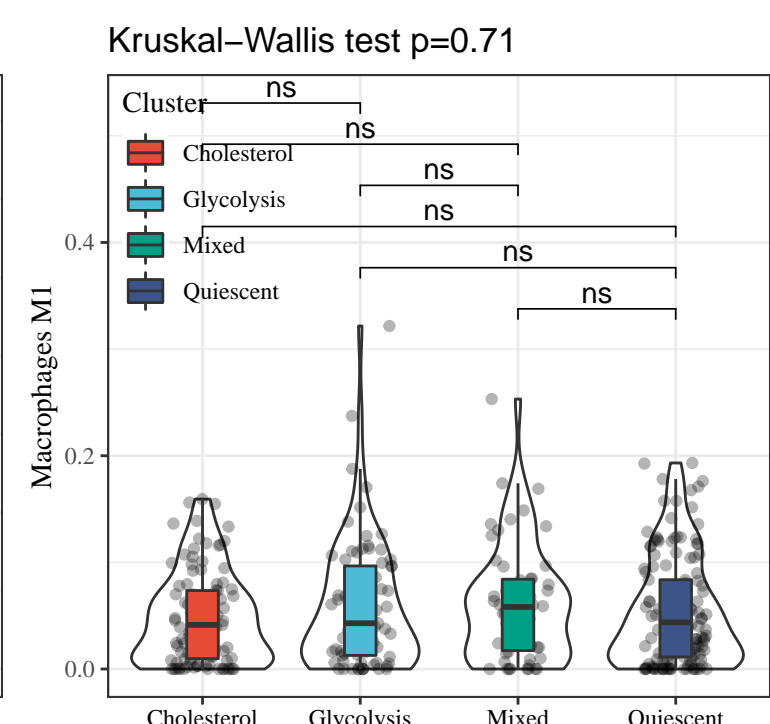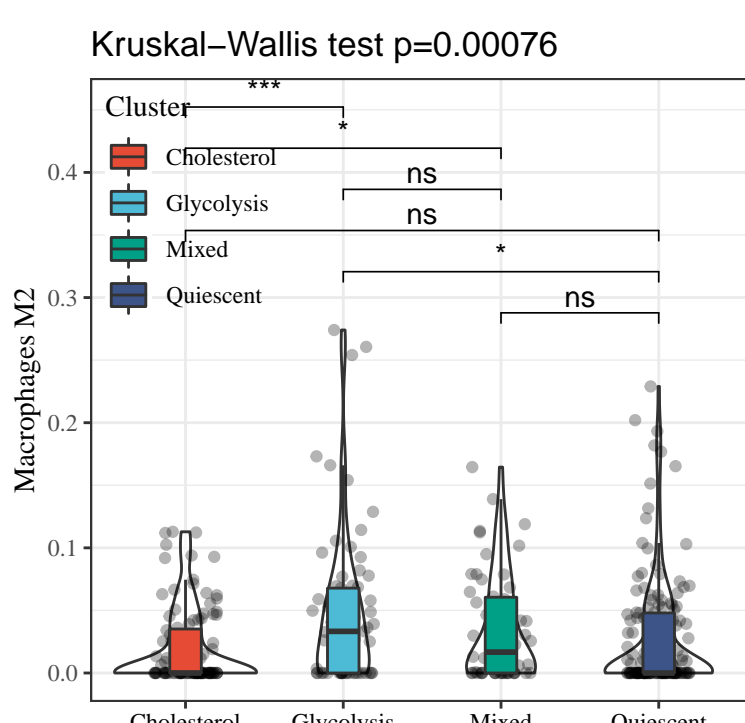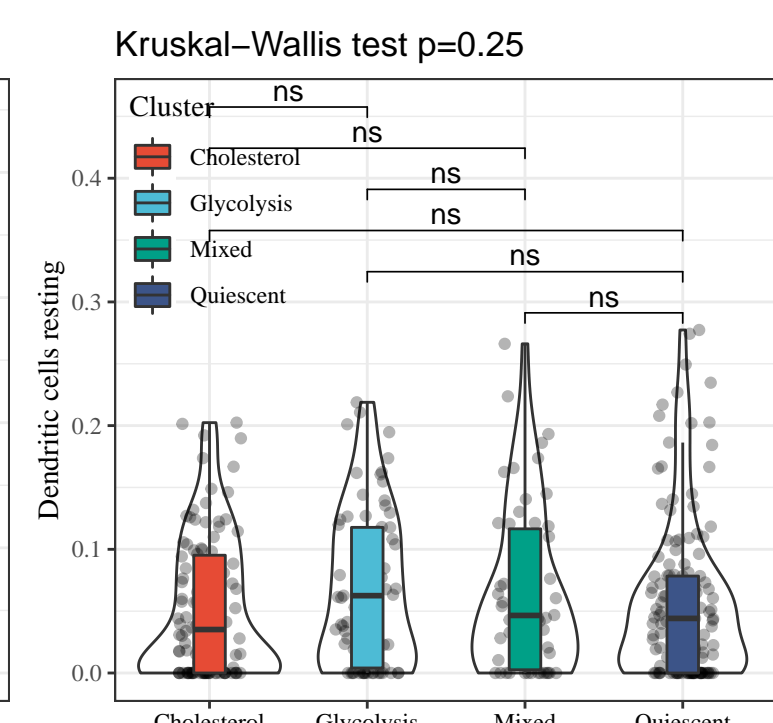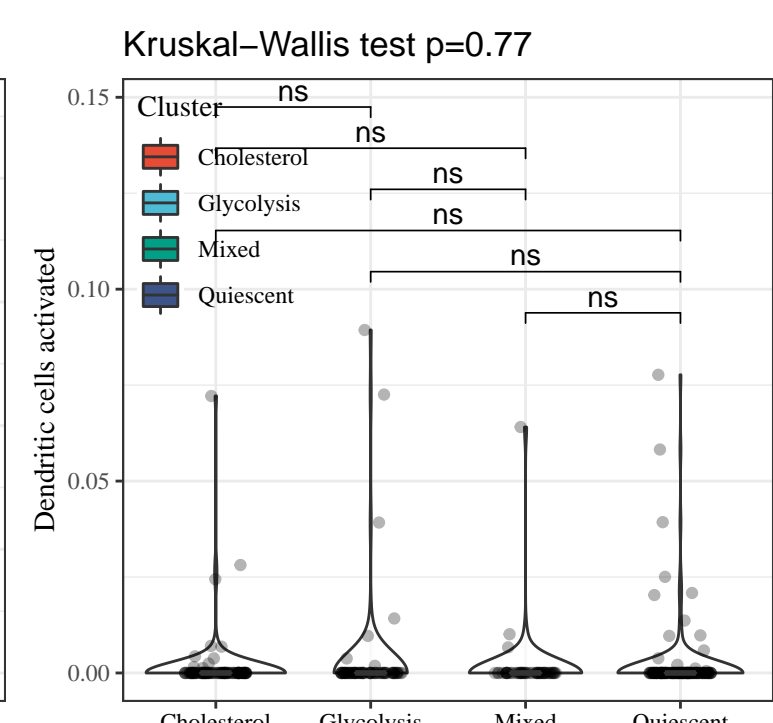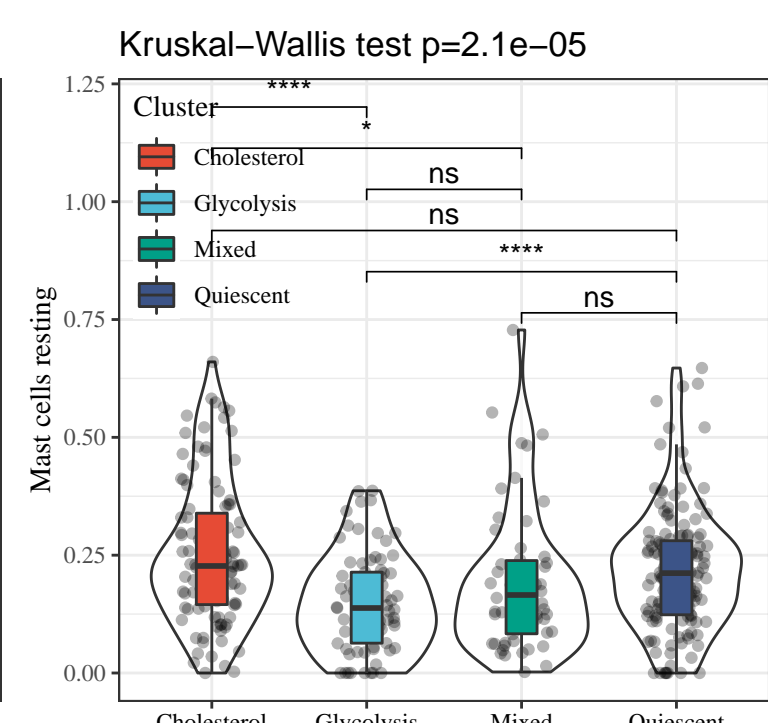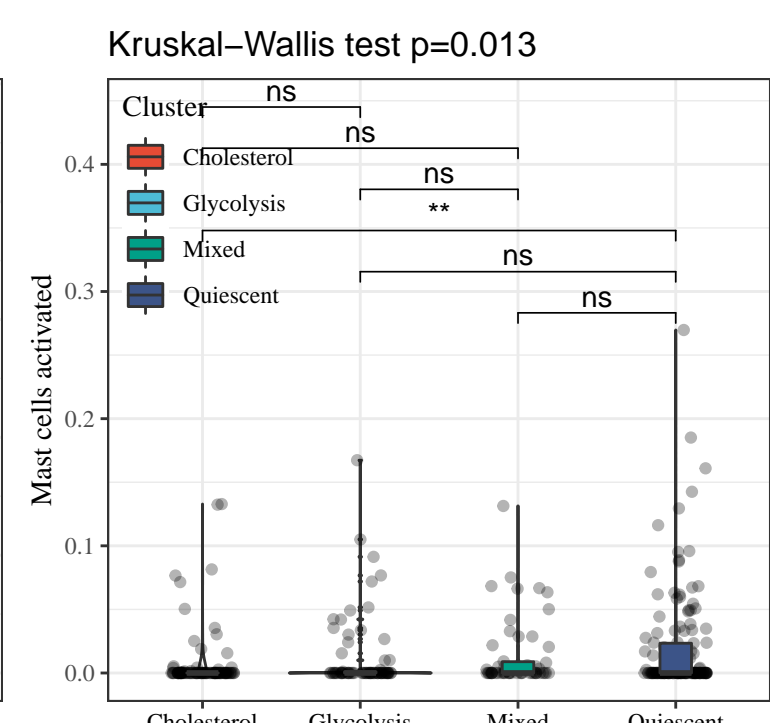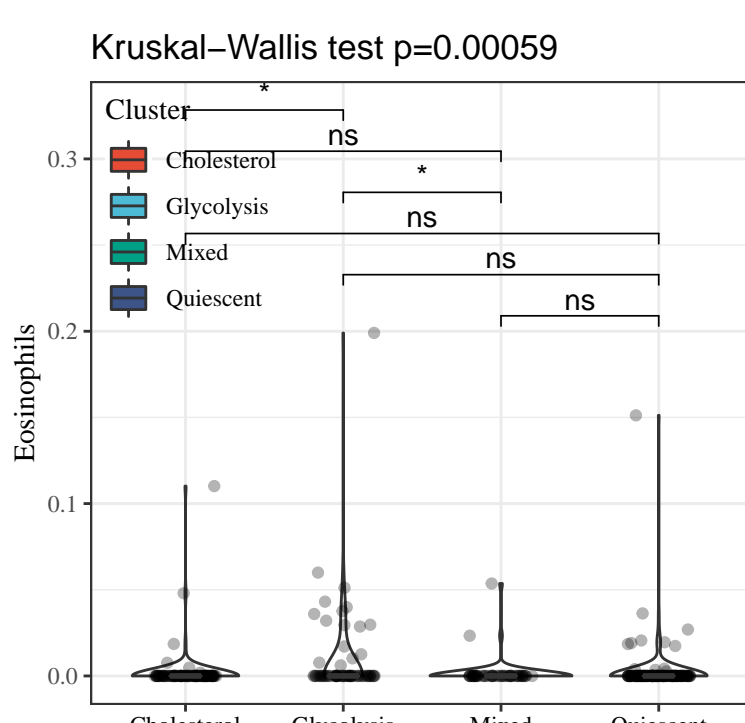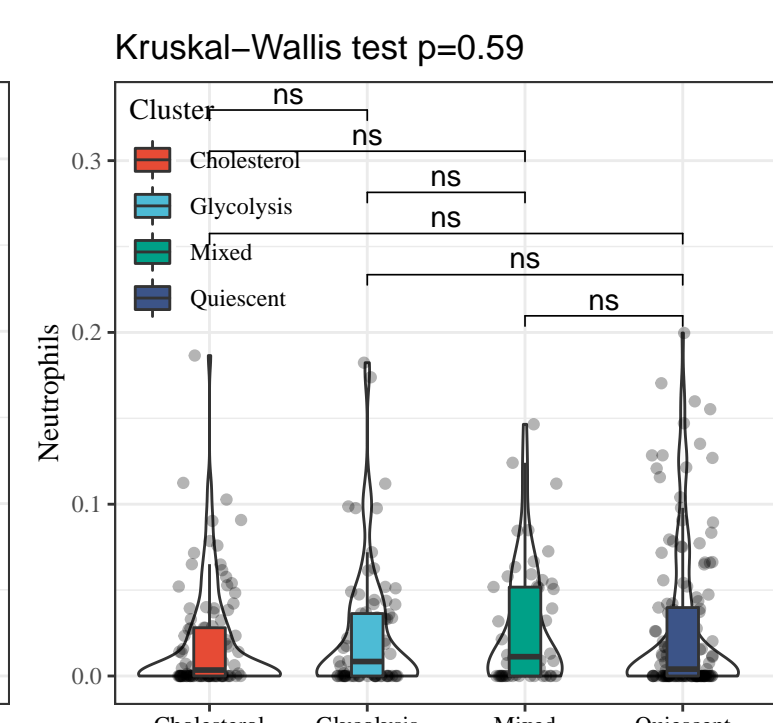

Supplement: f1 [file 2014625.f1.zip]
